# Supplementary material for: Impact of Social Media Engagement and Food Marketing Exposure on Cardiovascular Risk Factors in Jordanian Adults: A Cross-Sectional Study
Source: Research Square preprint supplement (doi:10.21203/rs.3.rs-7724259/v1), 2025-10-21
Supplement: Supplementary file 1 [file 45a6bdf96d3ba3f506862f1d.docx]

**Supplementary Tables**

| Table 2: Time spent on social media, lifestyle habits, and body composition (Mean±SD), n=222 | | | | | | |
| --- | --- | --- | --- | --- | --- | --- |
| Variable | The time spent on social media | | | | | |
| <1 hour | 1-3 hours | 3≥-5 hours | 5≥-7 hours | ≥7 hours |  |
| Mean±SD | Mean±SD | Mean±SD | Mean±SD | Mean±SD | *P*-value |
| Total PA MET | 2250.00±2173.06a | 660.66±1494.02b | 607.01±1213.75b | 379.04±762.12b | 374.59±1100.96b | **0.001** |
| Weekday sleep times (hours) | 3.00±0.53 | 2.24±0.97 | 2.22±1.02 | 2.54±1.13 | 2.34±1.11 | 0.153 |
| Weekend sleep times (hours) | 7.50±1.98 | 6.52±1.63 | 6.95±1.83 | 6.91±1.75 | 7.07±2.25 | 0.636 |
| Water intake (L) | 7.56±2.38 | 8.44±2.39 | 8.68±1.88 | 8.70± 2.13 | 9.32±2.30 | 0.226 |
| Waist Circumference (cm) | 86.70±11.08 | 88.12±13.39 | 85.97±14.10 | 85.52±13.24 | 87.29±15.52 | 0.932 |
| Waist-Hip Ratio | 0.90±0.06 | 0.90±0.07 | 2.06±10.66 | 0.89±0.07 | 0.89±0.07 | 0.811 |
| Current weight (kg) | 67.05±12.57 | 66.03±17.16 | 66.32±17.18 | 64.92±14.04 | 69.80±19.84 | 0.783 |
| Visceral fat level | 9.25±4.43 | 10.76±5.05 | 9.52±4.98 | 10.10±5.26 | 9.94±5.77 | 0.932 |
| Body mass index (kg/m2) | 25.43±4.33 | 24.92±6.10 | 23.96±4.72 | 23.74±4.40 | 24.99±5.87 | 0.810 |
| Fat mass (kg) | 20.53±6.72 | 24.04±11.01 | 21.15±9.80 | 22.05±9.79 | 22.66±12.30 | 0.824 |
| Fat percentage (%) | 31.07±9.30 | 36.65±14.86 | 31.42±9.85 | 33.31±11.18 | 31.54±11.11 | 0.444 |
| Muscle mass (kg) | 25.71±7.65 | 23.86±5.91 | 24.93±8.02 | 23.80±6.26 | 25.98±7.95 | 0.374 |
| An ANCOVA test was performed to assess the association between body composition and the time spent on social media. Data are presented as mean±SD. Statistical significance was set at *p*-value< 0.05. The Least Significant Difference was used for post-hoc analysis, different superscript letters within the same variable indicate statistical significance. | | | | | | |
