# Supplementary material for: Impact of Social Media Engagement and Food Marketing Exposure on Cardiovascular Risk Factors in Jordanian Adults: A Cross-Sectional Study
Source: Research Square preprint supplement (doi:10.21203/rs.3.rs-7724259/v1), 2025-10-21
Supplement: Supplementary file 2 [file 5ee070c3cd35f4541a8e8357.docx]

**Supplementary Tables**

| Table 1: Demographic and anthropometric data of study participants (Mean±SD), n=222 | |
| --- | --- |
| Characteristic | **Mean ±SD** |
| Age (Years) | 21.39±4.93 |
| Fat percentage (%) | 32.74±11.32 |
| Fat mass (kg) | 22.05±10.28 |
| Muscle mass (kg) | 24.65±7.22 |
| Visceral fat level | 9.92±5.16 |
| Waist circumference (cm) | 86.40±13.80 |
| Waist-hip ratio | 1.33±6.53 |
| Total Physical Activity (METs) | 575.16±1224.57 |
| Weekday sleep times (hours) | 6.92±1.85 |
| Weekend sleep times (hours) | 8.71±2.14 |
| Water intake (L) | 2.36±1.06 |
| Body Mass Index | 24.25±5.03 |
| The data was analyzed using SPSS software. METs: the metabolic equivalent of task. | |
